# Supplementary material
Source: PubMed Central journal article supplement (PMC2525807)

## **Supporting Information for:**

### **A single residue switch converts abietadiene synthase into a pimaradiene specific cyclase**

P. Ross Wilderman, Reuben J. Peters\*

*Iowa State University, Department of Biochemistry, Biophysics, and Molecular Biology, Ames, IA 50011*

## **Material and methods**

### *General*

Unless otherwise noted all chemicals were purchased from Fisher Scientific (Loughborough, Leicestershire, UK) and molecular biology reagents from Invitrogen (Carlsbad, CA, USA).

### *Mutagenesis*

Wild-type pseudo-mature AgAS<sup>1</sup> was transferred via PCR amplification and directional topoisomerase-mediated insertion into the Gateway system pENTR/SD/D-TOPO vector and verified by complete sequencing. Site directed mutagenesis was carried out via PCR amplification with overlapping mutagenic primers of the pENTR/AgAS vector. The resulting AgAS:A723S mutant was verified by complete sequencing. Both the wild-type and A723S mutant of AgAS were then transferred by directional recombination into the T7-promoter based Gateway expression vector pDEST14.

### *Product analysis*

For product analysis, the wild-type and A723S mutant of AgAS were co-expressed in the OverExpress C41 strain of *E. coli* (Lucigen, Middleton, WI) with an (*E,E,E*)-geranylgeranyl diphosphate (GGPP) synthase, using the previously described pGG vector.<sup>2</sup> Gas chromatography-mass spectrometry (GC-MS) was performed on organic extracts of the resulting recombinant cultures using an HP1-MS column on an Agilent (Palo Alto, CA) 6890N GC instrument with 5973N mass selective detector in electron-ionization mode (70 eV) located in the W.M. Keck Metabolomics Research laboratory at Iowa State University, much as previously described.<sup>3</sup> Briefly, 5  $\mu$ L of sample was injected at 40°C in splitless mode, the oven temperature held at 40°C for 3 min., then raised at 20°C/min. to 300°C, and held there for 3 min. MS data was collected from 50 to 500 *m/z* during the temperature ramp and final hold. The enzymatically produced diterpenes were identified by comparison of retention time and mass spectra to authentic samples (e.g. Supporting Figure).

### *Kinetic characterization*

Comparison of the diterpene yield from recombinant bacterial cultures co-expressing wild type or mutant diterpene synthases with a GGPP synthase has been correlated with relative catalytic efficiency *in vitro*,<sup>4</sup> and such comparative analysis demonstrated that the AgAS:A723S mutation actually increased diterpene production ~2-fold. For more detailed *in vitro* analysis AgAS constructs were expressed and purified as previously described.<sup>5</sup> To selectively determine the effect of the A723S mutation on the relevant class I activity assays were run with [1-<sup>3</sup>H<sub>1</sub>]-CPP. Given our limited quantities of this radiolabeled substrate, only specific activity was measured. Briefly, duplicate reactions were run in assay buffer (50 mM Hepes, pH 7.2, 7.5 mM MgCl<sub>2</sub>, 10% glycerol, 0.1 mg/mL  $\alpha$ -casein, and 5 mM fresh DTT) containing 5  $\mu$ M CPP and 10

nM AgAS for 1 min. at room temperature and stopped by the addition of KOH to 0.2 M and EDTA to 15 mM. The produced diterpenes were then extracted in hexanes, the pooled extract passed over a short silica gel column, and product formation assessed by scintillation count. Under these conditions AgAS:A723S exhibited specific activity of 0.3 units (nmole product/min.)/mg protein, while the wild type enzyme = 0.2 units/mg protein (both with standard error of <20%).

### **Literature References**

(1)Peters, R. J.; Flory, J. E.; Jetter, R.; Ravn, M. M.; Lee, H.-J.; Coates, R. M.; Croteau, R. B. *Biochemistry* **2000**, *39*, 15592-15602.

(2)Cyr, A.; Wilderman, P. R.; Determan, M.; Peters, R. J. *J. Am. Chem. Soc.* **2007**, *129*, 6684-6685.

(3)Xu, M.; Hillwig, M. L.; Prisic, S.; Coates, R. M.; Peters, R. J. *Plant J.* **2004**, *39*, 309-318.

(4)Xu, M.; Wilderman, P. R.; Peters, R. J. *Proc. Natl. Acad. Sci. U.S.A.* **2007**, *104*, 7397-7401.

(5)Prisic, S.; Peters, R. J. *Plant Physiol.* **2007**, *144*, 445-454.

**Supporting Figure:** Mass spectra for A) the AgAS:A723S major product (retention time = 13.33 min.) and B) authentic isopimara-7,15-diene (retention time = 13.32 min.).

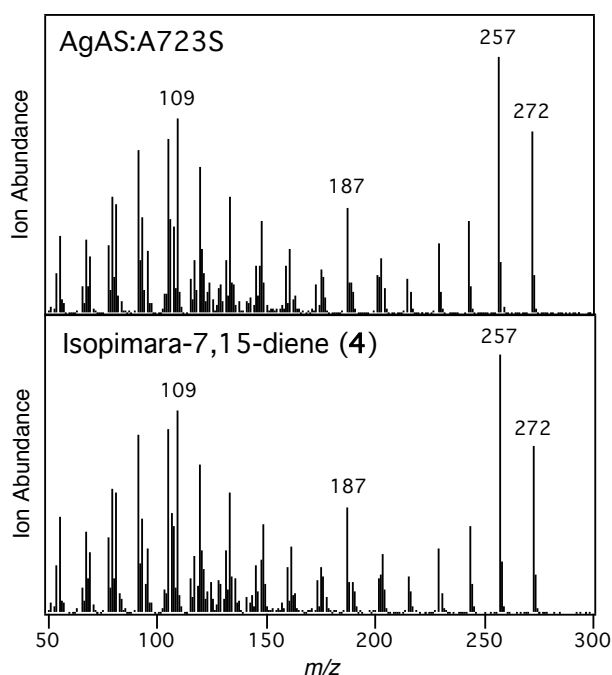

Supplement: NIHMS63570-supplement-1File002.pdf [file NIHMS63570-supplement-1File002.pdf]
